# Supplementary material for: Study on the Suitability of Tea Cultivars for Processing Oolong Tea from the Perspective of Aroma Based on Olfactory Sensory, Electronic Nose, and GC-MS Data Correlation Analysis
Source: MDPI journal article supplement (doi:10.3390/foods11182880), 2022-09-16
Supplement: s1 [file s1]

**Supplemental information:**

Table S1. Expert sensory and consumer acceptance evaluation of six oolong tea samples.

Table S2. The variables of the final step in the multiple regression linear model of consumer acceptance and its parameter estimation.

Table S3. The optimal multiple linear regression model equation.

Table S4. Parameter estimates, probability values and odds ratios of the influence of consumers' purchase intention.

Table S5. Stable response values of electronic nose sensors for six oolong tea samples.

Table S6. Adonis analysis results of adaptive grouping in PCA analysis of electronic nose data

Table S7. Adonis analysis results of sample grouping in PCoA analysis of HS-SPME-GC-MS data

Table S8. Adonis analysis results of suitability grouping in PCoA analysis of HS-SPME-GC-MS data of different samples

Table S9 Relative content of aroma compounds in HS-SPME-GC-MS analysis of six oolong tea samples.

Table S10 Spearman correlation coefficient of between electronic nose data, HS-SPME-GC-MS data, and sensory data in six tea cultivars.

Table S1 Expert sensory and consumer acceptance evaluation of six oolong tea samples

| Cultivars | Score of experts | Score of consumers | Aroma         | Total Score  | Suitability                      |
|-----------|------------------|--------------------|---------------|--------------|----------------------------------|
| FD        | 78.5±0.46d       | 5.37±0.87d         | green         | 77.74±0.22d  | Green tea, Black tea, White Tea  |
| YS        | 79.17±0.35d      | 5.45±1.53cd        | green         | 79.02±0.42d  | Green tea, Black tea             |
| WNZ       | 81.83±1.24c      | 5.25±0.75d         | green         | 81.33±0.67c  | Green tea                        |
| MZ        | 85.83±0.99b      | 6.52±1b            | Flavour       | 85.16±0.68b  | Oolong tea, Green tea, Black tea |
| HD        | 89.17±1.24a      | 7.57±1.01a         | Heavy flavour | 86.48±0.98ab | Oolong tea, Green tea, Black tea |
| TGY       | 89.17±0.35a      | 5.86±1.66c         | Heavy flavour | 86.66±0.33a  | Oolong tea, Green tea            |

Note: The significance of difference was calculated *via* one-way analysis of variance (ANOVA) at  $P < 0.05$ ; the relative content of each compound was expressed as average  $\pm$  standard error of the mean (n=3)

Table S2 The variables of the final step in the multiple regression linear model of consumer acceptance and its parameter estimation

|                 | WNZ                    |                      | YS                     |                      | FD                     |                      | HD                     |                      | MZ                     |                      | TGY                    |                      |
|-----------------|------------------------|----------------------|------------------------|----------------------|------------------------|----------------------|------------------------|----------------------|------------------------|----------------------|------------------------|----------------------|
|                 | Parameter<br>estimates | $\text{Pr} > \chi^2$ |
| X <sub>1</sub>  | 1.56509                | <.0001               |                        |                      | 0.32308                | 0.0002               | 0.47028                | <.0001               |                        |                      |                        |                      |
| X <sub>2</sub>  |                        |                      |                        |                      |                        |                      |                        |                      |                        |                      |                        |                      |
| X <sub>3</sub>  | -0.6822                | 0.035                | 0.67483                | <.0001               | 0.70018                | <.0001               | 0.32085                | 0.0004               | 0.90357                | <.0001               | 0.42598                | <.0001               |
| X <sub>4</sub>  |                        |                      |                        |                      |                        |                      |                        |                      |                        |                      | 0.31507                | <.0001               |
| X <sub>11</sub> |                        |                      |                        |                      |                        |                      |                        |                      |                        |                      |                        |                      |
| X <sub>22</sub> |                        |                      |                        |                      |                        |                      |                        |                      |                        |                      |                        |                      |
| X <sub>33</sub> |                        |                      |                        |                      |                        |                      |                        |                      | -0.04242               | 0.0066               |                        |                      |
| X <sub>44</sub> |                        |                      |                        |                      |                        |                      |                        |                      |                        |                      |                        |                      |
| X <sub>12</sub> | -0.17756               | 0.0051               | 0.04151                | <.0001               |                        |                      |                        |                      | 0.05555                | <.0001               | 0.03396                | 0.0008               |
| X <sub>13</sub> |                        |                      |                        |                      |                        |                      |                        |                      |                        |                      |                        |                      |
| X <sub>14</sub> |                        |                      |                        |                      |                        |                      |                        |                      |                        |                      |                        |                      |
| X <sub>23</sub> | 0.19058                | 0.001                |                        |                      |                        |                      |                        |                      |                        |                      |                        |                      |

X<sub>24</sub>

0.02997 0.0006

X<sub>34</sub>

Table S3 The optimal multiple linear regression model equation

| Cultivars | Model equation                                                                                | F Value | R <sup>2</sup> | Adj R <sup>2</sup> |
|-----------|-----------------------------------------------------------------------------------------------|---------|----------------|--------------------|
| WNZ       | Y=1.56509X <sub>1</sub> -0.6822X <sub>3</sub> -0.17756X <sub>12</sub> +0.19058x <sub>23</sub> | 973.27  | 0.9853         | 0.9843             |
| YS        | Y=0.67483X <sub>3</sub> +0.04151X <sub>12</sub>                                               | 1800.94 | 0.9816         | 0.981              |
| FD        | Y=0.32308X <sub>1</sub> +0.70018X <sub>3</sub>                                                | 1600.13 | 0.9836         | 0.9831             |
| HD        | Y=0.47028X <sub>1</sub> +0.32085X <sub>3</sub> +0.02997X <sub>24</sub>                        | 1716.22 | 0.9887         | 0.9881             |
| MZ        | Y=0.90357X <sub>3</sub> -0.04242X <sub>33</sub> +0.05555X <sub>12</sub>                       | 1108.67 | 0.9826         | 0.9817             |
| TGY       | Y=0.42598X <sub>3</sub> +0.31507X <sub>4</sub> +0.03396X <sub>12</sub>                        | 1197.18 | 0.9838         | 0.983              |

Note: For parameter estimates, the estimated parameter is the coefficient of the independent variable in the model equation, describing the influence of the independent variable on the dependent variable;  $Pr > \chi^2$  is the probability value of the estimated parameter ( $p < 0.05$  level). The REG algorithm in SAS 3.0 software was used for multiple regression analysis of the relationship between each endoplasmic factor and the overall acceptance index (overall evaluation). The overall evaluation index was used as the dependent variable (Y), and the four indicators (aroma, soup color, taste,

and infused leaf) as the original independent variables ( $X_1, X_2, X_3, X_4$ ). Due to the interaction between the indicators and the original independent variables, we set  $X_{11}, X_{22}, X_{33}, X_{44}, X_{12}, X_{13}, X_{14}, X_{23}, X_{24}$ , and  $X_{34}$  to represent the interaction between the indicators as binary independent variables ( $X_{11}=X_1*X_1, X_{12}=X_1*X_2, X_{13}=X_1*X_3, X_{14}=X_1*X_4, X_{22}=X_2*X_2, X_{23}=X_2*X_3, X_{24}=X_2*X_4, X_{33}=X_3*X_3, X_{34}=X_3*X_4, X_{44}=X_4*X_4$ ), and the original independent variables and binary independent variables were used for multiple regression analysis through the stepwise selection method to filter out the optimal indicators.

Table S4 Parameter estimates, probability values and odds ratios of the influence of consumers' purchase intention

|     |                     | Aroma   | Liquor color | Taste  | Infused leaf |
|-----|---------------------|---------|--------------|--------|--------------|
| WNZ | Parameter estimates | -1.2141 | 0.3147       | 1.9279 | 0.8372       |
|     | Pr > $\chi^2$       | 0.1583  | 0.6299       | 0.0724 | 0.2999       |
|     | odds ratio          | 0.297   | 1.37         | 6.875  | 2.31         |
| YS  | Parameter estimates | 0.6146  | -0.2586      | 0.7226 | 0.3123       |
|     | Pr > $\chi^2$       | 0.1051  | 0.5581       | 0.1475 | 0.5051       |
|     | odds ratio          | 1.849   | 0.772        | 2.06   | 1.367        |
| FD  | Parameter estimates | -0.9758 | 0.2847       | 2.0799 | -0.2165      |
|     | Pr > $\chi^2$       | 0.1662  | 0.7632       | 0.0256 | 0.7313       |
|     | odds ratio          | 0.377   | 1.329        | 8.004  | 0.805        |
| HD  | Parameter estimates | 0.6796  | 0.3962       | 0.2043 | 0.3138       |
|     | Pr > $\chi^2$       | 0.0276  | 0.2031       | 0.4703 | 0.1661       |
|     | odds ratio          | 1.973   | 1.486        | 1.227  | 1.369        |
| MZ  | Parameter estimates | 0.2468  | 0.4449       | 0.7147 | 0.1746       |
|     | Pr > $\chi^2$       | 0.5309  | 0.2199       | 0.0978 | 0.5892       |
|     | odds ratio          | 1.28    | 1.56         | 2.044  | 1.191        |
| TGY | Parameter estimates | 0.8962  | -0.0164      | 0.4997 | 0.35         |
|     | Pr > $\chi^2$       | 0.0456  | 0.9778       | 0.2832 | 0.5414       |
|     | odds ratio          | 2.45    | 0.984        | 1.648  | 1.419        |

Note: For parameter estimates, the estimated parameter is the coefficient of the independent variable in the model equation, describing the influence of the independent variable on the dependent variable; Pr >  $\chi^2$  is the probability value of the estimated parameter ( $p < 0.05$  level); since consumer purchase intention is a binary variable, we used logistic regression analysis to analyze the influence of four variables (aroma, soup color, taste, and infused leaf) on consumer purchase intention. A consumer's purchase intention score greater than "3" is defined as willing to buy, and a

score less than or equal to "3" is defined as unwilling to buy. Cells marked in red represent significant results.

Table S5 Stable response values of sensors in electronic nose analysis of six oolong tea samples

|       | LY2/LG  | LY2/G   | LY2/AA  | LY2/GH  | LY2/gCTL | LY2/gCT | T30/1   | P10/1   | P10/2   | P40/1   | T70/2   | PA/2    | P30/1   | P40/2   | P30/2   | T40/2   | T40/1   | TA/2    |
|-------|---------|---------|---------|---------|----------|---------|---------|---------|---------|---------|---------|---------|---------|---------|---------|---------|---------|---------|
| FD_1  | 0.03875 | -0.091  | -0.037  | -0.0807 | -0.0963  | -0.1898 | 0.78651 | 0.83547 | 0.62152 | 0.7281  | 0.74935 | 0.89496 | 0.87681 | 0.59597 | 0.74041 | 0.58605 | 0.54766 | 0.67552 |
| FD_2  | 0.04224 | -0.0922 | -0.0373 | -0.0825 | -0.0905  | -0.1961 | 0.80651 | 0.85289 | 0.6394  | 0.74818 | 0.76868 | 0.9027  | 0.88856 | 0.61819 | 0.74104 | 0.60535 | 0.58769 | 0.70412 |
| FD_3  | 0.04049 | -0.0868 | -0.0359 | -0.0778 | -0.0925  | -0.1883 | 0.79755 | 0.84929 | 0.6345  | 0.74358 | 0.75789 | 0.89773 | 0.88421 | 0.60773 | 0.72395 | 0.60161 | 0.57756 | 0.70667 |
| FD_4  | 0.04136 | -0.0931 | -0.0378 | -0.0826 | -0.1046  | -0.1992 | 0.79793 | 0.84695 | 0.62181 | 0.73892 | 0.75808 | 0.89351 | 0.88439 | 0.60354 | 0.7343  | 0.59955 | 0.57108 | 0.67917 |
| HD_1  | 0.0488  | -0.0465 | -0.0285 | -0.0427 | -0.0525  | -0.0764 | 0.66568 | 0.71462 | 0.52922 | 0.60614 | 0.60691 | 0.74615 | 0.779   | 0.51008 | 0.65056 | 0.475   | 0.4924  | 0.61364 |
| HD_2  | 0.04465 | -0.0473 | -0.0286 | -0.0453 | -0.0568  | -0.0799 | 0.63651 | 0.73112 | 0.56133 | 0.63572 | 0.58437 | 0.77524 | 0.76173 | 0.49592 | 0.66185 | 0.46859 | 0.58288 | 0.66604 |
| HD_3  | 0.04672 | -0.0497 | -0.0324 | -0.0449 | -0.0767  | -0.0849 | 0.63017 | 0.72682 | 0.55052 | 0.62965 | 0.57609 | 0.75284 | 0.75013 | 0.48704 | 0.63071 | 0.45702 | 0.52491 | 0.64176 |
| HD_4  | 0.04569 | -0.0446 | -0.0276 | -0.0411 | -0.0646  | -0.0901 | 0.66283 | 0.74873 | 0.56639 | 0.64895 | 0.61101 | 0.7931  | 0.78023 | 0.50601 | 0.65218 | 0.47802 | 0.55732 | 0.659   |
| MZ_1  | 0.02628 | -0.0342 | -0.0242 | -0.0309 | -0.0457  | -0.0653 | 0.58353 | 0.69644 | 0.52297 | 0.60362 | 0.5243  | 0.72126 | 0.70897 | 0.44747 | 0.56539 | 0.41983 | 0.50989 | 0.61464 |
| MZ_2  | 0.02906 | -0.0362 | -0.0252 | -0.0324 | -0.0587  | -0.0596 | 0.56248 | 0.6797  | 0.50786 | 0.5894  | 0.50315 | 0.70084 | 0.68907 | 0.42758 | 0.52733 | 0.40026 | 0.46956 | 0.60338 |
| MZ_3  | 0.02767 | -0.0347 | -0.0226 | -0.0323 | -0.0508  | -0.0729 | 0.65728 | 0.74055 | 0.54834 | 0.63922 | 0.59824 | 0.75645 | 0.76413 | 0.49622 | 0.6146  | 0.46688 | 0.56456 | 0.67297 |
| MZ_4  | 0.02837 | -0.0353 | -0.023  | -0.0322 | -0.0584  | -0.0733 | 0.66931 | 0.74421 | 0.54686 | 0.64096 | 0.60851 | 0.75502 | 0.77183 | 0.50448 | 0.61394 | 0.47315 | 0.50725 | 0.64571 |
| TGY_1 | 0.02852 | -0.0401 | -0.0183 | -0.0349 | -0.0491  | -0.0857 | 0.65613 | 0.75439 | 0.52585 | 0.63434 | 0.58972 | 0.77708 | 0.77523 | 0.48183 | 0.54234 | 0.47225 | 0.51667 | 0.60729 |
| TGY_2 | 0.03365 | -0.0483 | -0.0222 | -0.041  | -0.0465  | -0.1028 | 0.71474 | 0.78829 | 0.55668 | 0.66803 | 0.65639 | 0.82264 | 0.81907 | 0.52959 | 0.62385 | 0.5153  | 0.52628 | 0.63793 |
| TGY_3 | 0.03108 | -0.0516 | -0.0206 | -0.0443 | -0.0468  | -0.1061 | 0.69789 | 0.78347 | 0.55861 | 0.66696 | 0.63846 | 0.82553 | 0.81229 | 0.52072 | 0.59862 | 0.50923 | 0.55422 | 0.654   |

|       |         |         |         |         |         |         |         |         |         |         |         |         |         |         |         |         |         |         |
|-------|---------|---------|---------|---------|---------|---------|---------|---------|---------|---------|---------|---------|---------|---------|---------|---------|---------|---------|
| TGY_4 | 0.03236 | -0.0496 | -0.0206 | -0.0436 | -0.0491 | -0.1049 | 0.70686 | 0.78834 | 0.56176 | 0.67426 | 0.64684 | 0.82353 | 0.81535 | 0.52699 | 0.60615 | 0.51259 | 0.53314 | 0.66064 |
| WNZ_1 | 0.01326 | -0.0655 | -0.0293 | -0.0576 | -0.0678 | -0.1307 | 0.7056  | 0.77331 | 0.56953 | 0.66239 | 0.6617  | 0.84461 | 0.82178 | 0.5237  | 0.69692 | 0.5098  | 0.52242 | 0.62118 |
| WNZ_2 | 0.01617 | -0.0683 | -0.0297 | -0.0613 | -0.08   | -0.1361 | 0.72274 | 0.78917 | 0.57688 | 0.67996 | 0.67618 | 0.84945 | 0.83104 | 0.53741 | 0.68481 | 0.52862 | 0.51165 | 0.64257 |
| WNZ_3 | 0.01471 | -0.0607 | -0.0265 | -0.0531 | -0.0619 | -0.1186 | 0.69388 | 0.77332 | 0.574   | 0.66451 | 0.64263 | 0.82457 | 0.81098 | 0.51564 | 0.64416 | 0.50149 | 0.51277 | 0.64023 |
| WNZ_4 | 0.01544 | -0.0664 | -0.0316 | -0.0583 | -0.0896 | -0.1457 | 0.76039 | 0.80978 | 0.59404 | 0.70229 | 0.71624 | 0.86629 | 0.85654 | 0.56802 | 0.72609 | 0.55004 | 0.55849 | 0.66157 |
| YS_1  | 0.03037 | -0.0573 | -0.0244 | -0.0502 | -0.0681 | -0.1322 | 0.75501 | 0.8152  | 0.58369 | 0.70068 | 0.70164 | 0.85607 | 0.84544 | 0.56497 | 0.6691  | 0.55457 | 0.55171 | 0.66068 |
| YS_2  | 0.02999 | -0.0529 | -0.0239 | -0.0464 | -0.0713 | -0.1235 | 0.74811 | 0.81452 | 0.58438 | 0.70061 | 0.69195 | 0.85478 | 0.83896 | 0.56226 | 0.64978 | 0.55115 | 0.55559 | 0.67614 |
| YS_3  | 0.03018 | -0.0603 | -0.0283 | -0.0527 | -0.0811 | -0.1361 | 0.77217 | 0.825   | 0.58698 | 0.70678 | 0.72195 | 0.86017 | 0.85744 | 0.57903 | 0.6842  | 0.56916 | 0.54066 | 0.6581  |
| YS_4  | 0.03018 | -0.0568 | -0.0255 | -0.0498 | -0.0735 | -0.1306 | 0.75843 | 0.81824 | 0.58502 | 0.70269 | 0.70518 | 0.85701 | 0.84728 | 0.56875 | 0.66769 | 0.55829 | 0.54932 | 0.66497 |

Table S6 Adonis analysis results of adaptive grouping in PCA analysis of electronic nose data

|                | Df | SumOfSqs | R <sup>2</sup> | F      | Pr(>F)   |
|----------------|----|----------|----------------|--------|----------|
| Classification | 1  | 0.77346  | 0.57068        | 29.244 | 0.001*** |
| Residual       | 22 | 0.58188  | 0.42932        |        |          |
| Total          | 23 | 1.35534  | 1.00000        |        |          |

Table S7 Adonis analysis results of sample grouping in PCoA analysis of HS-SPME-GC-MS data

|                | Df | SumOfSqs | R <sup>2</sup> | F      | Pr(>F)   |
|----------------|----|----------|----------------|--------|----------|
| Classification | 1  | 0.070942 | 0.51893        | 17.259 | 0.001*** |
| Residual       | 16 | 0.065766 | 0.48107        |        |          |
| Total          | 17 | 0.136707 | 1.00000        |        |          |

Table S8 Adonis analysis results of suitability grouping in PCoA analysis of HS-SPME-GC-MS data of different samples

|          | Df | SumOfSqs | R <sup>2</sup> | F      | Pr(>F)   |
|----------|----|----------|----------------|--------|----------|
| Sample   | 5  | 0.99962  | 0.97109        | 80.612 | 0.001*** |
| Residual | 12 | 0.02976  | 0.02891        |        |          |
| Total    | 17 | 1.02938  | 1.00000        |        |          |

Table S9 Relative content of aroma compounds in HS-SPME-GC-MS analysis of six oolong tea samples.

| Name                                | type         | HD             | MZ             | TGY            | FD            | WNZ            | YS           | p  | p_value  | RT    | Experimental<br>RI | Reference<br>RI | CAS         | Descriptors in website                                                               | Descriptors<br>reference        | in    | references |
|-------------------------------------|--------------|----------------|----------------|----------------|---------------|----------------|--------------|----|----------|-------|--------------------|-----------------|-------------|--------------------------------------------------------------------------------------|---------------------------------|-------|------------|
| Benzaldehyde                        | AADVs        | 4.995±0.572    | 4.318±0.516    | 4.836±0.097    | 3.634±0.588   | 3.621±0.855    | 2.519±0.208  | ** | 0.001268 | 7.58  | 938                | 962             | 100-52-7    | strong sharp sweet bitter almond cherry                                              | almond                          |       | [40]       |
| 1-Heptanol                          | FADVs        | 5.991±0.118    | 3.154±0.036    | 6.753±1.021    | 0.51±0.422    | 6.46±0.25      | 5.276±0.124  | NA | 0.353837 | 7.78  | 947                | 970             | 111-70-6    | musty leafy violet herbal green sweet woody peony                                    | plant                           |       | [40]       |
| 1-Octen-3-ol                        | FADVs        | 5.206±0.936    | 1.875±0.335    | 2.031±0.05     | 1.282±0.296   | 3.494±0.496    | 1.226±0.043  | NA | 0.057631 | 7.89  | 952                | 982             | 3391-86-4   | mushroom earthy green oily fungal raw chicken                                        | mushroom                        |       | [40]       |
| 6-methyl-5-Hepten-2-one             | CDVs         | 49.646±6.357   | 22.978±3.741   | 29.408±0.725   | 12.767±1.278  | 15.88±2.578    | 10.786±0.518 | ** | 0.000349 | 8.18  | 965                | 986             | 110-93-0    | citrus                                                                               | green bean                      |       | [41]       |
| 2-Pentylfuran                       | others       | 21.522±4.13    | 18.608±2.348   | 22.664±1.836   | 12.522±2.346  | 9.481±0.2      | 6.687±0.501  | ** | 0.000349 | 8.38  | 975                | 979             | 3777-69-3   | fruity                                                                               | floral                          |       | [41]       |
| Octanal                             | others       | 2.359±0.224    | 3.09±0.091     | 2.475±0.162    | 0.405±0.066   | 0.606±0.021    | 1.3±0.08     | ** | 0.000349 | 8.74  | 991                | 1003            | 124-13-0    | Aldehydic, waxy, citrus orange with a green peely nuance                             | citrus, aldehydic, peel , green |       | [42]       |
| (E,E)-2,4-Heptadienal               | FADVs        | 7.438±0.906    | 7.906±0.995    | 1.37±0.007     | 3.677±0.712   | 2.343±0.434    | 1.376±0.104  | NA | 0.085089 | 8.97  | 1001               | 1012            | 4313-03-5   | Fatty, green, oily, aldehydic with a vegetative nuance                               | fatty                           |       | [41]       |
| Phenylacetaldehyde                  | AADVs        | 4.26±0.32      | 3.094±0.103    | 5.756±0.023    | 1.729±0.135   | 3.461±0.585    | 3.019±0.401  | *  | 0.015169 | 10.13 | 1030               | 1045            | 122-78-1    | Honey, floral rose, sweet, powdery, fermented, chocolate with a slight earthy nuance | floral, rose                    |       | [40]       |
| β-Ocimene                           | VTs          | 122.544±22.69  | 129.683±17.943 | 61.565±3.187   | 40.601±9.523  | 11.841±2.938   | 10.597±1.212 | ** | 0.000349 | 10.29 | 1034               | 1037            | 13877-91-3  | floral,Tropical, terpy and woody with vegetable nuances                              | green, slightly floral          |       | [43]       |
| (Z)-Furan oxide                     | linalool VTs | 77.707±0.929   | 73.05±7.885    | 33.41±4.645    | 28.022±1.544  | 38.978±5.292   | 12.479±0.5   | ** | 0.005411 | 11.26 | 1059               | 1074            | 5989-33-3   | earthy floral sweet woody                                                            | earthy floral , sweet woody     |       | [40]       |
| (E)-Furan oxide                     | linalool VTs | 51.225±9.371   | 20.778±2.187   | 14.137±2.66    | 14.519±0.801  | 8.476±0.44     | 5.448±0.297  | ** | 0.00172  | 11.94 | 1076               | 1086            | 34995-77-2  | floral                                                                               | floral                          |       | [40]       |
| linalool                            | VTs          | 267.016±35.698 | 314.73±57.3    | 103.264±21.521 | 74.465±3.253  | 112.028±11.256 | 17.799±0.312 | ** | 0.00172  | 12.51 | 1090               | 1099            | 78-70-6     | floral , Citrus, orange, floral, terpy, waxy and rose                                | citrus,floral                   |       | [41]       |
| 1,5,7-Octatrien-3-ol, 3,7-dimethyl- | VTs          | 207.888±40.014 | 92.287±11.628  | 31.763±9.528   | 127.17±21.027 | 56.931±0.648   | 3.671±0.029  | NA | 0.23323  | 12.66 | 1094               | 1107            | 29957-43-5  | mouldy                                                                               | ripe fruit                      |       | [44]       |
| Phenylethyl alcohol                 | AADVs        | 23.69±2.611    | 26.184±3.019   | 11.596±2.236   | 11.313±1.732  | 6.86±0.318     | 12.308±1.846 | ** | 0.005411 | 12.98 | 1102               | 1116            | 1960, 12, 8 | floral , sweet floral fresh bready rose honey                                        | sweet floral, rose honey        | fresh | [40]       |
| (3E)-4,8-Dimethyl-1,3,7-nonatriene  | VTs          | 51.028±8.093   | 68.657±8.507   | 59.225±4.24    | 30.621±6.026  | 9.674±0.219    | 18.078±1.602 | ** | 0.000349 | 13.15 | 1105               | 1116            | 19945-61-0  | NA                                                                                   | floral scent                    |       | [45]       |

|                                         |        |              |                |              |              |              |             |    |          |       |      |      |            |                                                                                                |                                         |      |
|-----------------------------------------|--------|--------------|----------------|--------------|--------------|--------------|-------------|----|----------|-------|------|------|------------|------------------------------------------------------------------------------------------------|-----------------------------------------|------|
| Cosmene                                 | VTs    | 12.785±1.84  | 5.516±0.981    | 5.432±0.331  | 5.644±1.185  | 2.942±0.077  | 1.023±0.15  | ** | 0.007077 | 13.89 | 1120 | 1131 | 460-01-5   | NA                                                                                             | NA                                      |      |
| Benzyl nitrile                          | AADVs  | 14.943±1.027 | 10.821±0.895   | 4.085±0.16   | 9.577±2.553  | 5.43±0.566   | 6.077±0.718 | NA | 0.353837 | 14.15 | 1125 | 1144 | 140-29-4   | NA                                                                                             | NA                                      |      |
| (R,S)-5-Ethyl-6-methyl-3E-hepten-2-one  | AADVs  | 35.633±3.095 | 11.863±0.596   | 44.964±8.105 | 7.235±0.113  | 6.852±1.211  | 6.378±0.312 | ** | 0.000349 | 14.39 | 1130 | 1144 | 57283-79-1 | NA                                                                                             | special aroma                           | [46] |
| (E)-Pyranoid linalool oxide             | VTs    | 39.437±7.584 | 18.455±1.516   | 17.363±0.093 | 13.709±2.289 | 10.627±1.133 | 5.96±0.264  | ** | 0.000349 | 15.87 | 1159 | 1173 | 39028-58-5 | woody                                                                                          | woody                                   | [40] |
| Linalool oxide pyranoside               | VTs    | 38.651±4.976 | 10.329±2.003   | 26.552±2.595 | 17.145±0.9   | 5.354±0.064  | 7.88±0.565  | ** | 0.005411 | 16.11 | 1164 | 1178 | 14049-11-7 | floral honey                                                                                   | earthy                                  | [21] |
| (E)-2,6-Dimethyl-3,7-octadiene-2,6-diol | VTs    | 21.362±1.752 | 4.413±0.234    | 2.807±0.45   | 3.9±0.031    | 17.076±4.211 | 0.469±0.08  | NA | 0.26969  | 16.85 | 1178 | 1190 | 13741-21-4 | NA                                                                                             | sweet,citrus                            | [47] |
| Methyl salicylate                       | AADVs  | 53.49±6.521  | 31.148±6.064   | 7.235±1.817  | 5.486±0.06   | 7.924±2.86   | 4.002±0.382 | ** | 0.004107 | 16.95 | 1180 | 1192 | 119-36-8   | minty , Sweet, salicylate, root beer, wintergreen, aromatic, slightly phenolic and camphoreous | Sweet , wintergreen , romatic, phenolic | [40] |
| Butanoic acid, hexyl ester              | FADVs  | 7.528±0.545  | 7.377±1.463    | 12.504±0.015 | 5.064±0.074  | 3.695±0.287  | 2.766±0.216 | ** | 0.000349 | 17.1  | 1183 | 1192 | 2639-63-6  | green , green sweet fruity apple waxy soapy                                                    | fruity,andvegetative                    | [48] |
| α-Terpineol                             | VTs    | 3.833±0.171  | 5.445±0.721    | 1.351±0.078  | 3.378±0.054  | 2.114±0.305  | 0.62±0.026  | *  | 0.046945 | 17.2  | 1185 | 1189 | 98-55-5    | terpenic, pine terpenic lilac citrus woody floral                                              | lemon citrus , floral                   | [40] |
| Dodecane                                | others | 5.743±0.929  | 3.874±0.407    | 30.745±2.315 | 4.512±0.328  | 6.124±0.924  | 2.632±0.226 | NA | 0.14512  | 17.63 | 1194 | 1200 | 112-40-3   | NA                                                                                             | NA                                      |      |
| Decanal                                 | others | 11.387±1.72  | 7.811±1.384    | 8.074±0.904  | 3.872±0.606  | 4.873±0.661  | 2.518±0.043 | ** | 0.000349 | 17.86 | 1198 | 1206 | 112-31-2   | aldehydic , weet aldehydic waxy orange peel citrus floral                                      | vegetal, fruity, flowery                | [49] |
| (E,E)-2,4-Nonadienal                    | others | 4.149±0.489  | 3.179±0.542    | 3.583±0.156  | 1.779±0.176  | 2.195±0.192  | 1.184±0.132 | ** | 0.000349 | 18.28 | 1206 | 1216 | 5910-87-2  | fatty, fatty melon waxy green violet leaf cucumber fruit tropical fruit chicken fat            | baked bread, peanut                     | [49] |
| Linalyl formate                         | VTs    | 4.989±0.315  | 5.935±0.917    | 2.034±0.254  | 2.124±0.025  | 1.878±0.208  | 0.829±0.043 | ** | 0.005411 | 18.8  | 1215 | 1215 | 115-99-1   | herbal , citrus herbal bergamot lavender soapy fatty green woody                               | sweet odor                              | [50] |
| (Z)-3-Hexenyl-α-methylbutyrate          | FADVs  | 47.6±4.337   | 49.716±7.811   | 6.886±0.062  | 27.537±5.694 | 16.204±1.764 | 9.592±0.83  | NA | 0.23323  | 19.21 | 1222 | 1234 | 53398-85-9 | green , fresh green apple sweet fruity pear                                                    | herbal, sweet                           | [51] |
| (Z)-3-Hexenyl isovalerate               | FADVs  | 15.334±2.074 | 24.667±4.362   | 9.263±0.256  | 18.965±2.673 | 14.168±3.237 | 4.69±0.588  | NA | 0.401542 | 19.51 | 1227 | 1238 | 35154-45-1 | green , fresh apple green apple fruity tropical pineapple                                      | fruity green, waxy pear, winey          | [40] |
| Geraniol                                | VTs    | 60.763±7.452 | 110.334±19.314 | 19.351±2.07  | 33.67±1.182  | 20.109±2.432 | 5.943±0.546 | *  | 0.024341 | 20.28 | 1241 | 1255 | 106-24-1   | floral , sweet floral fruity rose waxy citrus                                                  | sweet floral, fruity rose waxy, citrus  | [40] |
| (Z)-2-Decenal                           | others | 19.263±1.802 | 10.659±1.37    | 9.747±0.324  | 5.469±1.107  | 5.448±0.63   | 3.045±0.249 | ** | 0.000349 | 20.95 | 1253 | 1252 | 2497-25-8  | fatty, tallow fatty                                                                            | fruity or fat odor                      | [52] |

|                                   |        |                |                |              |                |              |              |    |          |       |      |      |            |                                                                          |                                                           |      |
|-----------------------------------|--------|----------------|----------------|--------------|----------------|--------------|--------------|----|----------|-------|------|------|------------|--------------------------------------------------------------------------|-----------------------------------------------------------|------|
| Indole                            | AADVs  | 191.251±15.395 | 100.832±12.531 | 82.382±0.908 | 47.926±1.621   | 32.312±4.571 | 41.379±1.18  | ** | 0.000349 | 22.37 | 1278 | 1295 | 120-72-9   | animal, pungent floral<br>naphthyl fecal animal<br>musty                 | sour fruit                                                | [53] |
| Methyl geranate                   | others | 4.525±0.257    | 4.254±0.008    | 1.639±0.007  | 2.13±0.152     | 1.03±0.077   | 1.401±0.03   | ** | 0.005411 | 24.41 | 1313 | 1323 | 2349-14-6  | NA                                                                       | sweet candy                                               | [54] |
| α-Cubebene                        | VTs    | 18.816±3.553   | 4.275±0.144    | 4.24±0.713   | 4.471±0.43     | 1.976±0.329  | 0.912±0.138  | ** | 0.00919  | 25.88 | 1338 | 1351 | 17699-14-8 | herbal, herbal waxy                                                      | wax, herb,ripe fruit                                      | [55] |
| (E)-2-Undecenal                   | others | 16.934±1.098   | 8.115±1.421    | 11.859±2.321 | 4.489±0.761    | 4.616±0.892  | 3.465±0.382  | ** | 0.000349 | 27.11 | 1358 | 1365 | 53448-07-0 | fruity , fresh fruity<br>citrus orange peel                              | Fresh fragrance,<br>cabbage, cabbage,<br>copper           | [56] |
| (Z)-3-Hexenyl<br>hexanoate        | FADVs  | 317.295±39.426 | 168.079±26.335 | 94.47±17.301 | 116.897±14.308 | 92.21±1.337  | 52.673±6.39  | ** | 0.00919  | 28.21 | 1377 | 1386 | 31501-11-8 | green , fruity green<br>waxy pear winery<br>tropical grassy<br>pineapple | fruity green, waxy<br>pear, winery                        | [40] |
| (Z)-3-Hexenyl (Z)-<br>3-hexenoate | FADVs  | 63.337±7.789   | 30.419±1.471   | 41.91±7.93   | 5.975±0.597    | 7.018±0.692  | 6.132±0.632  | ** | 0.000349 | 28.41 | 1380 | 1389 | 61444-38-0 | green , green tomato<br>leaf pear melon<br>metallic fennel tropical      | Passion fruit                                             | [57] |
| Hexanoic acid,<br>hexyl ester     | FADVs  | 67.922±6.959   | 33.906±2.603   | 41.081±6.914 | 59.006±4.562   | 48.296±7.545 | 10.389±0.443 | NA | 0.691102 | 28.55 | 1382 | 1384 | 6378-65-0  | green , herbal fresh<br>green grassy vegetable<br>fruity                 | Grass                                                     | [58] |
| (Z)-Jasmone                       | FADVs  | 34.521±4.008   | 22.828±3.482   | 48.314±0.885 | 16.363±2.117   | 10.992±0.896 | 13.977±1.129 | ** | 0.000349 | 28.62 | 1384 | 1394 | 488-10-8   | floral , woody herbal<br>floral spicy jasmin<br>celery                   | fruity rose, honey<br>tobacco, sweet                      | [40] |
| (E)-2-Hexenyl<br>hexanoate        | FADVs  | 23.673±2.315   | 13.471±2.327   | 36.524±2.946 | 10.842±1.148   | 36.023±7.015 | 7.791±0.729  | NA | 0.102345 | 28.71 | 1385 | 1391 | 53398-86-0 | green , green natural<br>cognac herbal waxy<br>clean                     | green                                                     | [59] |
| β-Caryophyllen                    | VTs    | 30.431±4.077   | 14.33±1.695    | 15.892±0.095 | 18.55±1.865    | 4.038±0.092  | 2.031±0.135  | *  | 0.046945 | 29.97 | 1409 | 1419 | 87-44-5    | spicy , sweet woody<br>spicy clove dry                                   | woody and spicy                                           | [60] |
| α-Ionone                          | FADVs  | 10.65±1.389    | 5.636±0.429    | 12.31±1.575  | 5.887±0.625    | 6.062±0.639  | 5.468±0.312  | *  | 0.03051  | 30.16 | 1414 | 1426 | 127-41-3   | floral , sweet woody<br>floral violet orris<br>tropical fruity           | sweet woody ,<br>floral violet, orris<br>tropical, fruity | [40] |
| γ-Elemene                         | VTs    | 7.263±1.298    | 8.165±1.221    | 8.807±1.557  | 3.66±0.394     | 2.241±0.21   | 1.833±0.048  | ** | 0.000349 | 30.54 | 1423 | 1433 | 29873-99-2 | NA                                                                       | NA                                                        |      |
| β-Phenylethyl<br>butyrate         | AADVs  | 6.908±1.303    | 8.994±1.768    | 1.992±0.199  | 5.431±0.203    | 1.354±0.238  | 3.633±0.365  | NA | 0.057631 | 30.98 | 1433 | 1447 | 103-52-6   | floral , musty sweet<br>floral yeasty strawberry                         | fruity, sweet                                             | [40] |
| Isoeugenol                        | others | 9.893±0.517    | 9.464±0.387    | 0±0          | 3.99±0.073     | 8.498±0.596  | 2.123±0.136  | NA | 0.232264 | 31.2  | 1440 | 1450 | 97-54-1    | spicy , sweet spicy<br>clove woody allspice<br>carnation floral          | floral, spicy                                             | [61] |
| (E)-Geranylacetone                | CDVs   | 50.619±7.127   | 22.795±2.836   | 29.766±3.948 | 17.91±2.485    | 22.746±1.911 | 19.925±0.673 | ** | 0.002316 | 31.43 | 1444 | 1435 | 3796-70-1  | floral,fresh green fruity<br>waxy rose woody<br>magnolia tropical        | Honey, floral, spicy,<br>sweet                            | [62] |
| Humulene                          | VTs    | 10.918±1.808   | 4.502±0.339    | 9.69±1.609   | 3.063±0.141    | 4.328±0.143  | 1.47±0.09    | ** | 0.000929 | 31.56 | 1447 | 1454 | 6753-98-6  | woody                                                                    | woody, musty (in<br>beer)                                 | [63] |
| (E)-β-Famesene                    | VTs    | 34.831±1.657   | 18.412±3.183   | 20.624±0.593 | 10.868±0.951   | 8.395±0.2    | 5.228±0.081  | ** | 0.000349 | 31.7  | 1451 | 1457 | 18794-84-8 | woody,woody citrus<br>herbal sweet                                       | Wood, citrus, sweet                                       | [64] |

|                           |        |                 |                 |                |                |                |                |    |          |       |      |      |            |                                                              |                                                 |      |
|---------------------------|--------|-----------------|-----------------|----------------|----------------|----------------|----------------|----|----------|-------|------|------|------------|--------------------------------------------------------------|-------------------------------------------------|------|
| (E)-2-Dodecenal           | others | 5.972±0.385     | 2.595±0.374     | 10.496±0.344   | 2.265±0.062    | 2.784±0.072    | 2.194±0.213    | ** | 0.007077 | 32.23 | 1464 | 1468 | 20407-84-5 | herbal, citrus metallic<br>mandarin orange waxy<br>aldehydic | paperboard                                      | [65] |
| β-Ionone                  | CDVs   | 50.133±7.248    | 28.747±3.185    | 51.626±4.696   | 21.315±2.959   | 22.586±1.047   | 20.638±0.363   | ** | 0.000349 | 32.58 | 1472 | 1491 | 79-77-6    | floral,dry powdery<br>floral woody orris berry<br>seedy      | sweet fruity ,<br>woody berry ,<br>floral seedy | [40] |
| (Z,E)-α-Farnesene         | VTs    | 80.357±6.414    | 36.165±3.406    | 64.668±7.148   | 26.101±0.365   | 27.531±0.814   | 15.328±0.539   | ** | 0.000349 | 33.2  | 1487 | 1491 | 26560-14-5 | NA                                                           | NA                                              |      |
| α-Muurolene               | VTs    | 32.145±4.023    | 7.807±1.157     | 16.3±0.433     | 9.468±1.582    | 3.027±0.135    | 1.589±0.248    | ** | 0.003095 | 33.35 | 1491 | 1499 | 10208-80-7 | NA                                                           | NA                                              |      |
| α-Farnesene               | VTs    | 1310.571±67.069 | 772.189±116.822 | 613.723±21.838 | 626.814±40.145 | 631.589±79.248 | 328.155±36.369 | ** | 0.00919  | 33.73 | 1501 | 1508 | 502-61-4   | woody,citrus<br>lavender bergamot<br>myrrh neroli green      | herbal<br>fruity,wood, sweet,<br>floral, herb   | [66] |
| γ-Cadinene                | VTs    | 19±2.324        | 0±0             | 12.084±0.788   | 6.798±0.585    | 0±0            | 1.613±0.022    | NA | 0.105459 | 33.85 | 1504 | 1513 | 39029-41-9 | woody,herbal woody                                           | NA                                              | [21] |
| δ-Cadinene                | VTs    | 132.843±8.435   | 28.198±3.893    | 44.899±7.918   | 40.784±6.194   | 11.34±2.128    | 3.965±0.622    | *  | 0.011849 | 34.07 | 1511 | 1524 | 483-76-1   | herbal,thyme<br>woody dry                                    | herbal<br>herbal, woody                         | [67] |
| (E)-Nerolidol             | VTs    | 499.908±100.29  | 536.389±106.633 | 185.131±10.677 | 271.212±10.693 | 205.391±23.341 | 155.583±3.465  | *  | 0.037977 | 35.54 | 1558 | 1564 | 7212-44-4  | floral, floral green<br>waxy citrus woody                    | floral green, citrus<br>woody, waxy             | [40] |
| (Z)-3-Hexenyl benzoate    | AADVs  | 69.185±6.964    | 68.167±12.479   | 52.654±5.564   | 56.922±0.175   | 33.778±1.854   | 38.96±1.8      | ** | 0.005411 | 35.77 | 1565 | 1570 | 25152-85-6 | green, green sweet oily<br>floral spicy fruity               | pear-like                                       | [58] |
| Nerolidol                 | VTs    | 41.799±5.71     | 20.466±3.095    | 45.321±3.563   | 24.826±1.888   | 41.061±7.426   | 10.851±0.253   | NA | 0.171098 | 35.93 | 1571 | 1564 | 40716-66-3 | floral, floral green<br>citrus woody waxy                    | Rose-like                                       | [54] |
| Benzoic acid, hexyl ester | AADVs  | 17.582±0.826    | 12.13±2.237     | 11.815±0.682   | 17.429±0.035   | 11.995±2.107   | 7.205±0.713    | NA | 0.353837 | 36.03 | 1574 | 1580 | 6789-88-4  | balsamic, fresh<br>balsamic sappy clean<br>woody             | sweet fruit                                     | [68] |
| E-2-Hexenyl benzoate      | AADVs  | 7.095±1.085     | 3.165±0.525     | 6.524±0.908    | 4.551±0.016    | 7.737±1.319    | 4.191±0.517    | NA | 0.894626 | 36.26 | 1581 | 1588 | 76841-70-8 | NA                                                           | NA                                              |      |
| Geranyl isovalerate       | AADVs  | 9.1±1.111       | 3.279±0.336     | 7.237±0.193    | 2.85±0.31      | 3.089±0.488    | 1.739±0.249    | ** | 0.001268 | 36.72 | 1596 | 1606 | 109-20-6   | fruity, green<br>apple blueberry<br>pineapple                | fruity<br>NA                                    |      |
| T-Muurolol                | VTs    | 26.752±1.516    | 4.305±0.354     | 7.77±0.745     | 4.297±0.086    | 1.235±0.156    | 0.885±0.294    | ** | 0.001268 | 37.85 | 1636 | 1642 | 19912-62-0 | herbal, herbal<br>honey                                      | spicy<br>NA                                     |      |
| α-Cadinol                 | VTs    | 45.47±4.808     | 9.332±1.553     | 16.539±1.209   | 10.247±1.053   | 7.162±0.357    | 4.161±0.609    | ** | 0.002316 | 38.17 | 1650 | 1653 | 481-34-5   | herbal, herbal woody                                         | spicy                                           | [69] |

Note: p: significant results based on Kruskal-Wallis test; "\*" indicates p<0.05; "\*\*\*" indicates p<0.01, and "NA" indicates p>0.05. Experimental RI: retention index in the research. Reference RI: retention index in the NIST 2014 database. CAS: the CAS number in the NIST 2014 database. Descriptors in website: the Descriptors in the website: <http://www.thegoodscentcompany.com>.

**Table S10 Spearman correlation coefficient of between electronic nose data, HS-SPME-GC-MS data, and sensory data in six tea cultivars.**

|                                        | P  | TYPE   | LY2G     | LY2AA    | LY2GH    | LY2gCTL  | LY2gCT   | T301     | P101     | P102     | P401     | T702     | PA2      | P301     | P402     | P302     | T402     | TA2      | Expert   | Consumer |
|----------------------------------------|----|--------|----------|----------|----------|----------|----------|----------|----------|----------|----------|----------|----------|----------|----------|----------|----------|----------|----------|----------|
| Benzaldehyde                           | ** | AADVs  | 0.6      | 0.314286 | 0.542857 | 0.6      | 0.6      | -0.65714 | -0.65714 | -0.6     | -0.65714 | -0.65714 | -0.65714 | -0.65714 | -0.65714 | -0.54286 | -0.65714 | -0.37143 | 0.811679 | 0.771429 |
| 6-methyl-5-Hepten-2-one                | ** | CDVs   | 0.657143 | 0.371429 | 0.6      | 0.657143 | 0.657143 | -0.77143 | -0.77143 | -0.71429 | -0.77143 | -0.77143 | -0.77143 | -0.77143 | -0.77143 | -0.6     | -0.77143 | -0.54286 | 0.927634 | 0.714286 |
| 2-Pentylfuran                          | ** | others | 0.542857 | 0.485714 | 0.6      | 0.714286 | 0.542857 | -0.6     | -0.6     | -0.65714 | -0.6     | -0.6     | -0.6     | -0.6     | -0.6     | -0.6     | -0.6     | -0.48571 | 0.811679 | 0.657143 |
| Octanal                                | ** | others | 0.942857 | 0.885714 | 1        | 0.942857 | 0.942857 | -0.88571 | -0.88571 | -0.94286 | -0.88571 | -0.88571 | -0.88571 | -0.88571 | -0.88571 | -1       | -0.88571 | -0.82857 | 0.753702 | 0.771429 |
| Phenylacetaldehyde                     | *  | AADVs  | 0.485714 | 0.542857 | 0.542857 | 0.714286 | 0.485714 | -0.6     | -0.6     | -0.65714 | -0.6     | -0.6     | -0.6     | -0.6     | -0.6     | -0.54286 | -0.6     | -0.6     | 0.927634 | 0.428571 |
| β-Ocimene                              | ** | VTs    | 0.771429 | 0.371429 | 0.714286 | 0.6      | 0.771429 | -0.82857 | -0.82857 | -0.77143 | -0.82857 | -0.82857 | -0.82857 | -0.82857 | -0.82857 | -0.71429 | -0.82857 | -0.6     | 0.637748 | 0.771429 |
| (Z)-Furan linalool oxide               | ** | VTs    | 0.657143 | 0.085714 | 0.485714 | 0.371429 | 0.657143 | -0.82857 | -0.82857 | -0.65714 | -0.82857 | -0.82857 | -0.82857 | -0.82857 | -0.82857 | -0.48571 | -0.82857 | -0.54286 | 0.695725 | 0.6      |
| (E)-Furan linalool oxide               | ** | VTs    | 0.542857 | -0.02857 | 0.371429 | 0.257143 | 0.542857 | -0.6     | -0.6     | -0.42857 | -0.6     | -0.6     | -0.6     | -0.6     | -0.6     | -0.37143 | -0.6     | -0.2     | 0.463817 | 0.714286 |
| linalool                               | ** | VTs    | 0.714286 | 0.2      | 0.6      | 0.428571 | 0.714286 | -0.88571 | -0.88571 | -0.77143 | -0.88571 | -0.88571 | -0.88571 | -0.88571 | -0.88571 | -0.6     | -0.88571 | -0.71429 | 0.60876  | 0.542857 |
| Phenylethyl alcohol                    | ** | AADVs  | 0.885714 | 0.542857 | 0.771429 | 0.6      | 0.885714 | -0.71429 | -0.71429 | -0.6     | -0.71429 | -0.71429 | -0.71429 | -0.71429 | -0.71429 | -0.77143 | -0.71429 | -0.37143 | 0.434828 | 0.885714 |
| (3E)-4,8-Dimethyl-1,3,7-nonatriene     | ** | VTs    | 0.771429 | 0.657143 | 0.828571 | 0.771429 | 0.771429 | -0.71429 | -0.71429 | -0.77143 | -0.71429 | -0.71429 | -0.71429 | -0.71429 | -0.71429 | -0.82857 | -0.71429 | -0.6     | 0.579771 | 0.771429 |
| Cosmene                                | ** | VTs    | 0.257143 | -0.25714 | 0.085714 | 0.028571 | 0.257143 | -0.31429 | -0.31429 | -0.14286 | -0.31429 | -0.31429 | -0.31429 | -0.31429 | -0.31429 | -0.08571 | -0.31429 | 0.085714 | 0.289886 | 0.542857 |
| (R,S)-5-Ethyl-6-methyl-3E-hepten-2-one | ** | CDVs   | 0.542857 | 0.485714 | 0.6      | 0.714286 | 0.542857 | -0.6     | -0.6     | -0.65714 | -0.6     | -0.6     | -0.6     | -0.6     | -0.6     | -0.6     | -0.6     | -0.48571 | 0.811679 | 0.657143 |
| (E)-Pyranoid linalool oxide            | ** | VTs    | 0.714286 | 0.257143 | 0.6      | 0.542857 | 0.714286 | -0.77143 | -0.77143 | -0.65714 | -0.77143 | -0.77143 | -0.77143 | -0.77143 | -0.77143 | -0.6     | -0.77143 | -0.42857 | 0.724714 | 0.828571 |
| Linalool oxide pyranoside              | ** | VTs    | 0.371429 | 0.2      | 0.314286 | 0.428571 | 0.371429 | -0.31429 | -0.31429 | -0.25714 | -0.31429 | -0.31429 | -0.31429 | -0.31429 | -0.31429 | -0.31429 | -0.31429 | 0.028571 | 0.579771 | 0.714286 |
| Methyl salicylate                      | ** | AADVs  | 0.657143 | 0.085714 | 0.485714 | 0.371429 | 0.657143 | -0.82857 | -0.82857 | -0.65714 | -0.82857 | -0.82857 | -0.82857 | -0.82857 | -0.82857 | -0.48571 | -0.82857 | -0.54286 | 0.695725 | 0.6      |
| Butanoic acid, hexyl ester             | ** | FADVs  | 0.542857 | 0.485714 | 0.6      | 0.714286 | 0.542857 | -0.6     | -0.6     | -0.65714 | -0.6     | -0.6     | -0.6     | -0.6     | -0.6     | -0.6     | -0.6     | -0.48571 | 0.811679 | 0.657143 |
| α-Terpineol                            | *  | VTs    | 0.485714 | -0.14286 | 0.314286 | 0.085714 | 0.485714 | -0.6     | -0.6     | -0.42857 | -0.6     | -0.6     | -0.6     | -0.6     | -0.6     | -0.31429 | -0.6     | -0.31429 | 0.231908 | 0.485714 |
| Decanal                                | ** | others | 0.657143 | 0.371429 | 0.6      | 0.657143 | 0.657143 | -0.77143 | -0.77143 | -0.71429 | -0.77143 | -0.77143 | -0.77143 | -0.77143 | -0.77143 | -0.6     | -0.77143 | -0.54286 | 0.927634 | 0.714286 |
| (E,E)-2,4-Nonadienal                   | ** | others | 0.657143 | 0.371429 | 0.6      | 0.657143 | 0.657143 | -0.77143 | -0.77143 | -0.71429 | -0.77143 | -0.77143 | -0.77143 | -0.77143 | -0.77143 | -0.6     | -0.77143 | -0.54286 | 0.927634 | 0.714286 |
| Linalyl formate                        | ** | VTs    | 0.6      | 0.085714 | 0.485714 | 0.314286 | 0.6      | -0.65714 | -0.65714 | -0.54286 | -0.65714 | -0.65714 | -0.65714 | -0.65714 | -0.65714 | -0.48571 | -0.65714 | -0.37143 | 0.376851 | 0.657143 |
| Geraniol                               | *  | VTs    | 0.485714 | -0.14286 | 0.314286 | 0.085714 | 0.485714 | -0.6     | -0.6     | -0.42857 | -0.6     | -0.6     | -0.6     | -0.6     | -0.6     | -0.31429 | -0.6     | -0.31429 | 0.231908 | 0.485714 |
| (Z)-2-Decenal                          | ** | others | 0.714286 | 0.257143 | 0.6      | 0.542857 | 0.714286 | -0.77143 | -0.77143 | -0.65714 | -0.77143 | -0.77143 | -0.77143 | -0.77143 | -0.77143 | -0.6     | -0.77143 | -0.42857 | 0.724714 | 0.828571 |
| Indole                                 | ** | AADVs  | 0.771429 | 0.371429 | 0.657143 | 0.6      | 0.771429 | -0.71429 | -0.71429 | -0.6     | -0.71429 | -0.71429 | -0.71429 | -0.71429 | -0.71429 | -0.65714 | -0.71429 | -0.31429 | 0.666737 | 0.942857 |
| Methyl geranate                        | ** | others | 0.6      | 0.085714 | 0.428571 | 0.314286 | 0.6      | -0.54286 | -0.54286 | -0.37143 | -0.54286 | -0.54286 | -0.54286 | -0.54286 | -0.54286 | -0.42857 | -0.54286 | -0.08571 | 0.40584  | 0.828571 |
| α-Cubebene                             | ** | VTs    | 0.257143 | -0.25714 | 0.085714 | 0.028571 | 0.257143 | -0.31429 | -0.31429 | -0.14286 | -0.31429 | -0.31429 | -0.31429 | -0.31429 | -0.31429 | -0.08571 | -0.31429 | 0.085714 | 0.289886 | 0.542857 |
| (E)-2-Undecenal                        | ** | others | 0.657143 | 0.371429 | 0.6      | 0.657143 | 0.657143 | -0.77143 | -0.77143 | -0.71429 | -0.77143 | -0.77143 | -0.77143 | -0.77143 | -0.77143 | -0.6     | -0.77143 | -0.54286 | 0.927634 | 0.714286 |
| (Z)-3-Hexenyl hexanoate                | ** | FADVs  | 0.542857 | -0.02857 | 0.371429 | 0.257143 | 0.542857 | -0.6     | -0.6     | -0.42857 | -0.6     | -0.6     | -0.6     | -0.6     | -0.6     | -0.37143 | -0.6     | -0.2     | 0.463817 | 0.714286 |
| (Z)-3-Hexenyl (Z)-3-hexenoate          | ** | FADVs  | 0.771429 | 0.542857 | 0.714286 | 0.771429 | 0.771429 | -0.82857 | -0.82857 | -0.77143 | -0.82857 | -0.82857 | -0.82857 | -0.82857 | -0.82857 | -0.71429 | -0.82857 | -0.6     | 0.985611 | 0.771429 |
| (Z)-Jasmone                            | ** | FADVs  | 0.6      | 0.6      | 0.657143 | 0.771429 | 0.6      | -0.54286 | -0.54286 | -0.6     | -0.54286 | -0.54286 | -0.54286 | -0.54286 | -0.54286 | -0.65714 | -0.54286 | -0.37143 | 0.753702 | 0.771429 |
| β-Caryophyllen                         | *  | VTs    | 0.142857 | -0.2     | 0.028571 | 0.085714 | 0.142857 | -0.2     | -0.2     | -0.08571 | -0.2     | -0.2     | -0.2     | -0.2     | -0.2     | -0.02857 | -0.2     | 0.142857 | 0.376851 | 0.485714 |
| α-Ionone                               | *  | CDVs   | 0.085714 | 0.142857 | 0.142857 | 0.371429 | 0.085714 | -0.25714 | -0.25714 | -0.31429 | -0.25714 | -0.25714 | -0.25714 | -0.25714 | -0.25714 | -0.14286 | -0.25714 | -0.25714 | 0.695725 | 0.2      |
| γ-Elemene                              | ** | VTs    | 0.6      | 0.6      | 0.714286 | 0.771429 | 0.6      | -0.65714 | -0.65714 | -0.77143 | -0.65714 | -0.65714 | -0.65714 | -0.65714 | -0.65714 | -0.71429 | -0.65714 | -0.65714 | 0.724714 | 0.6      |
| (Z)-Geranylacetone                     | ** | CDVs   | 0.771429 | 0.542857 | 0.714286 | 0.771429 | 0.771429 | -0.82857 | -0.82857 | -0.77143 | -0.82857 | -0.82857 | -0.82857 | -0.82857 | -0.82857 | -0.71429 | -0.82857 | -0.6     | 0.985611 | 0.771429 |
| Humulene                               | ** | VTs    | 0.657143 | 0.371429 | 0.6      | 0.657143 | 0.657143 | -0.77143 | -0.77143 | -0.71429 | -0.77143 | -0.77143 | -0.77143 | -0.77143 | -0.77143 | -0.6     | -0.77143 | -0.54286 | 0.927634 | 0.714286 |
| (E)-β-Farnesene                        | ** | VTs    | 0.6      | 0.314286 | 0.542857 | 0.6      | 0.6      | -0.65714 | -0.65714 | -0.6     | -0.65714 | -0.65714 | -0.65714 | -0.65714 | -0.65714 | -0.54286 | -0.65714 | -0.37143 | 0.811679 | 0.771429 |
| (E)-2-Dodecenal                        | ** | others | 0.371429 | 0.371429 | 0.428571 | 0.6      | 0.371429 | -0.54286 | -0.54286 | -0.6     | -0.54286 | -0.54286 | -0.54286 | -0.54286 | -0.54286 | -0.42857 | -0.54286 | -0.54286 | 0.869657 | 0.371429 |
| β-Ionone                               | ** | CDVs   | 0.6      | 0.542857 | 0.657143 | 0.771429 | 0.6      | -0.71429 | -0.71429 | -0.77143 | -0.71429 | -0.71429 | -0.71429 | -0.71429 | -0.71429 | -0.65714 | -0.71429 | -0.65714 | 0.927634 | 0.6      |
| (Z,E)-α-Farnesene                      | ** | VTs    | 0.657143 | 0.371429 | 0.6      | 0.657143 | 0.657143 | -0.77143 | -0.77143 | -0.71429 | -0.77143 | -0.77143 | -0.77143 | -0.77143 | -0.77143 | -0.6     | -0.77143 | -0.54286 | 0.927634 | 0.714286 |

|                        |    |       |          |          |          |          |          |          |          |          |          |          |          |          |          |          |          |          |          |          |
|------------------------|----|-------|----------|----------|----------|----------|----------|----------|----------|----------|----------|----------|----------|----------|----------|----------|----------|----------|----------|----------|
| $\alpha$ -Muurolene    | ** | VTs   | 0.314286 | 0.085714 | 0.257143 | 0.371429 | 0.314286 | -0.37143 | -0.37143 | -0.31429 | -0.37143 | -0.37143 | -0.37143 | -0.37143 | -0.37143 | -0.25714 | -0.37143 | -0.08571 | 0.637748 | 0.6      |
| $\alpha$ -Farnesene    | ** | VTs   | 0.485714 | -0.2     | 0.257143 | 0.085714 | 0.485714 | -0.65714 | -0.65714 | -0.42857 | -0.65714 | -0.65714 | -0.65714 | -0.65714 | -0.65714 | -0.25714 | -0.65714 | -0.31429 | 0.434828 | 0.485714 |
| $\delta$ -Cadinene     | *  | VTs   | 0.314286 | 0.085714 | 0.257143 | 0.371429 | 0.314286 | -0.37143 | -0.37143 | -0.31429 | -0.37143 | -0.37143 | -0.37143 | -0.37143 | -0.37143 | -0.25714 | -0.37143 | -0.08571 | 0.637748 | 0.6      |
| (E)-Nerolidol          | *  | VTs   | 0.485714 | -0.14286 | 0.314286 | 0.085714 | 0.485714 | -0.6     | -0.6     | -0.42857 | -0.6     | -0.6     | -0.6     | -0.6     | -0.6     | -0.31429 | -0.6     | -0.31429 | 0.231908 | 0.485714 |
| (Z)-3-Hexenyl benzoate | ** | AADVs | 0.6      | 0.085714 | 0.428571 | 0.314286 | 0.6      | -0.54286 | -0.54286 | -0.37143 | -0.54286 | -0.54286 | -0.54286 | -0.54286 | -0.54286 | -0.42857 | -0.54286 | -0.08571 | 0.40584  | 0.828571 |
| Geranyl isovalerate    | ** | AADVs | 0.657143 | 0.371429 | 0.6      | 0.657143 | 0.657143 | -0.77143 | -0.77143 | -0.71429 | -0.77143 | -0.77143 | -0.77143 | -0.77143 | -0.77143 | -0.6     | -0.77143 | -0.54286 | 0.927634 | 0.714286 |
| T-Muurolol             | ** | VTs   | 0.6      | 0.314286 | 0.542857 | 0.6      | 0.6      | -0.65714 | -0.65714 | -0.6     | -0.65714 | -0.65714 | -0.65714 | -0.65714 | -0.65714 | -0.54286 | -0.65714 | -0.37143 | 0.811679 | 0.771429 |
| $\alpha$ -Cadinol      | ** | VTs   | 0.314286 | 0.085714 | 0.257143 | 0.371429 | 0.314286 | -0.37143 | -0.37143 | -0.31429 | -0.37143 | -0.37143 | -0.37143 | -0.37143 | -0.37143 | -0.25714 | -0.37143 | -0.08571 | 0.637748 | 0.6      |
| Expert                 |    |       | 0.753702 | 0.637748 | 0.753702 | 0.840668 | 0.753702 | -0.81168 | -0.81168 | -0.81168 | -0.81168 | -0.81168 | -0.81168 | -0.81168 | -0.81168 | -0.7537  | -0.81168 | -0.66674 | 1        | 0.724714 |
| Consumer               |    |       | 0.885714 | 0.542857 | 0.771429 | 0.714286 | 0.885714 | -0.77143 | -0.77143 | -0.65714 | -0.77143 | -0.77143 | -0.77143 | -0.77143 | -0.77143 | -0.77143 | -0.77143 | -0.37143 | 0.724714 | 1        |

**Notes:** Expert: the average score of expert sensory evaluation. Consumer: the average score of consumer acceptance evaluation
